# Supplementary material for: Oxadiazole- and triazole-based highly-efficient thermally activated delayed fluorescence emitters for organic light-emitting diodes
Source: Royal Society of Chemistry journal article supplement (doi:10.1039/c3tc30699b), 2013-01-01
Supplement: c3tc30699b.pdf [file c3tc30699b.pdf]

1        **Oxadiazole- and triazole-based highly-efficient thermally activated**  
2        **delayed fluorescence emitters for organic light-emitting diodes**

3  
4                Jiyoung Lee,<sup>a</sup> Katsuyuki Shizu,<sup>b</sup> Hiroyuki Tanaka,<sup>b</sup> Hiroko Nomura,<sup>b</sup>  
5                Takuma Yasuda,<sup>a,b,c</sup> and Chihaya Adachi<sup>b,c</sup>

6  
7        <sup>a</sup>Department of Automotive Science, Graduate School of Integrated Frontier Sciences,

8                Kyushu University, 744 Motoooka, Nishi, Fukuoka 819-0395, Japan

9                <sup>b</sup>Center for Organic Photonics and Electronics Research (OPERA),

10                Kyushu University, 744 Motoooka, Nishi, Fukuoka 819-0395, Japan

11                <sup>c</sup>International Institute for Carbon Neutral Energy Research (WPI-I2CNER),

12                Kyushu University, 744 Motoooka, Nishi, Fukuoka 819-0395, Japan

13

14

15

1 **1. Preparation of 10-(4-(5-phenyl-1,3,4-oxadiazol-2-yl)phenyl)-10H-phenoxazine**  
2 **(PXZ-OXD)**

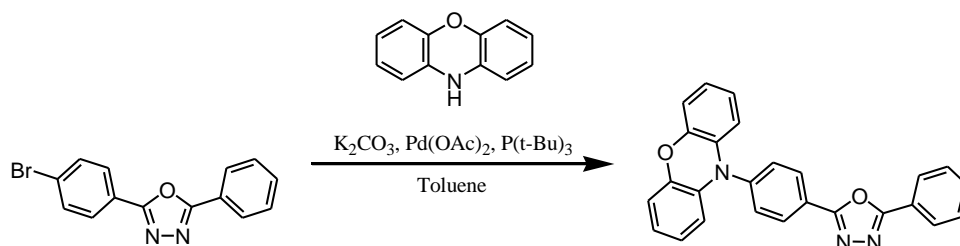

6 To a solution of 2-(4-bromophenyl)-5-phenyl-1,3,4-oxadiazole (1.20 g, 3.98 mmol,  
7 synthesized by a reported method<sup>S1</sup>), phenoxazine (802 mg, 4.38 mmol) and potassium  
8 carbonate (1.81 g, 13.1 mmol) in toluene (30 mL) was added, with stirring, a solution of  
9 palladium(II) acetate (29.2 mg, 0.13 mmol) and tri-*tert*-butylphosphine (97.1 mg, 0.48  
10 mmol) in toluene (30 mL). The mixture was stirred and heated under reflux for one day.  
11 The cooled mixture was partitioned between chloroform and water. The organic layer  
12 was separated, and the aqueous layer was extracted with chloroform. The combined  
13 organic layers were washed with brine, dried over MgSO<sub>4</sub>, and concentrated *in vacuo*.  
14 Purification of the residue by column chromatography (eluent: toluene/ethyl acetate =  
15 10:1) afforded 1.52 g of PXZ-OXD. The yield was over 94%. The compound was  
16 further purified by sublimation under reduced pressure for OLED fabrication.

17 [NMR]

18 <sup>1</sup>H NMR (CDCl<sub>3</sub>, 300 MHz)  $\delta$  = 5.98(d, 2H), 6.64(t, 2H), 6.69(t, 2H), 6.72(d, 2H),  
19 7.55(m, 5H), 8.17(d, 2H), 8.38(d, 2H); <sup>13</sup>C NMR (CDCl<sub>3</sub>, 300MHz)  $\delta$  = 113.3, 115.7,  
20 121.9, 123.3, 127.0, 129.2, 129.7, 131.8, 131.9, 133.7, 142.4, 144.0.

21 <sup>1</sup>H NMR spectrum is shown below.

22 [MS]

23 MALDI-MS *m/z*. Calcd for C<sub>26</sub>H<sub>17</sub>N<sub>3</sub>O<sub>2</sub>: 403; found: 403.

24 [Element analysis]

25 Calcd for C<sub>26</sub>H<sub>17</sub>N<sub>3</sub>O<sub>2</sub>: C, 77.41; H, 4.25; N, 10.42; found: C, 77.58; H, 4.18; N, 10.42.

26

27

1 **2. Preparation of 2,5-bis(4-(10H-phenoxazin-10-yl)phenyl)-1,3,4-oxadiazole**  
2 **(2PXZ-OXD)**

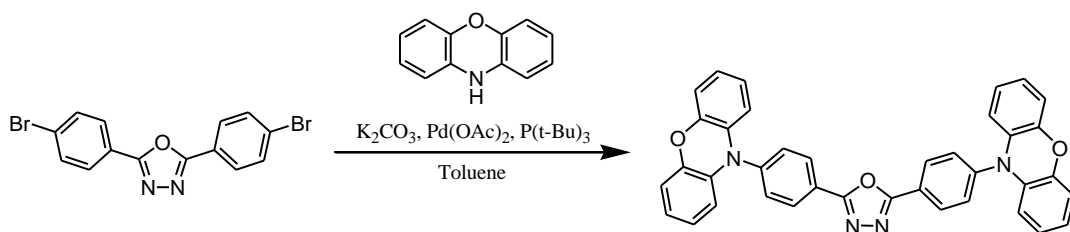

6 To a solution of 2,5-bis(4-bromophenyl)-1,3,4-oxadiazole (630.8 mg, 1.66 mmol,  
7 synthesized by a reported method<sup>S2</sup>), phenoxazine (668.7 mg, 3.65 mmol) and  
8 potassium carbonate (1.52 g, 11.0 mmol) in toluene (25 mL) was added, with stirring, a  
9 solution of palladium(II) acetate (25.0 mg, 0.11 mmol) and tri-*tert*-butylphosphine (81.0  
10 mg, 0.40 mmol) in toluene (25 mL). The mixture was stirred and heated under reflux for  
11 one day. The cooled mixture was partitioned between chloroform and water. The  
12 organic layer was separated, and the aqueous layer was extracted with chloroform. The  
13 combined organic layers were washed with brine, dried over MgSO<sub>4</sub>, and concentrated  
14 *in vacuo*. Purification of the residue by column chromatography (eluent: chloroform)  
15 afforded 965.2 mg of 2PXZ-OXD. The yield was over 99%. The compound was further  
16 purified by sublimation under reduced pressure for OLED fabrication.

17 [NMR]

18 <sup>1</sup>H NMR (CDCl<sub>3</sub>, 300 MHz)  $\delta$  = 5.99(d, 4H), 6.61(t, 4H), 6.68(m, 8H), 7.57(d, 4H),  
19 8.39(d, 4H); <sup>13</sup>C NMR (CDCl<sub>3</sub>, 300MHz)  $\delta$  = 113.3, 115.8, 121.9, 123.3, 129.7, 131.9,  
20 133.7, 142.6, 144.0, 164.2.

21 <sup>1</sup>H NMR spectrum is shown below.

22 [MS]

23 MALDI-MS *m/z*. Calcd for C<sub>38</sub>H<sub>24</sub>N<sub>4</sub>O<sub>3</sub>: 584; found: 584.

24 [Element analysis]

25 Calcd for C<sub>38</sub>H<sub>24</sub>N<sub>4</sub>O<sub>3</sub>: C, 78.07; H, 4.14; N, 9.58; found: C, 78.02; H, 4.06; N, 9.56.

26  
27

1 **3. Preparation of 10-(4-(4,5-diphenyl-4H-1,2,4-triazol-3-yl)phenyl)-10H-**  
2 **phenoxazine (PXZ-TAZ)**

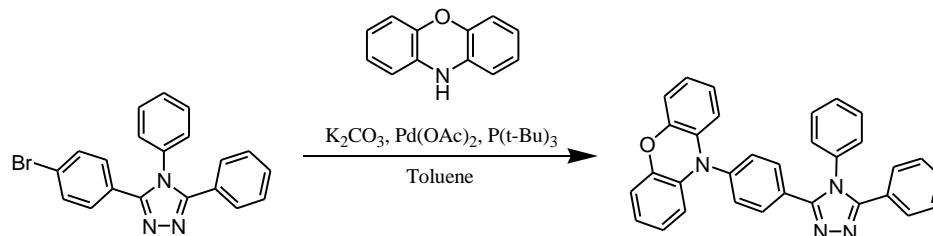

6 To a solution of 3-(4-bromophenyl)-4,5-diphenyl-1,2,4-triazole (1.00 g, 2.66 mmol,  
7 synthesized by a reported method<sup>S3</sup>), phenoxazine (537 mg, 2.93 mmol) and potassium  
8 carbonate (1.21 g, 8.79 mmol) in toluene (20 mL) was added, with stirring, a solution of  
9 palladium(II) acetate (20.2 mg, 0.09 mmol) and tri-*tert*-butylphosphine (64.7 mg, 0.32  
10 mmol) in toluene (20 mL). The mixture was stirred and heated under reflux for one day.  
11 The cooled mixture was partitioned between chloroform and water. The organic layer  
12 was separated, and the aqueous layer was extracted with chloroform. The combined  
13 organic layers were washed with brine, dried over MgSO<sub>4</sub>, and concentrated *in vacuo*.  
14 Purification of the residue by column chromatography (eluent: toluene/ethyl acetate =  
15 1:1) afforded 1.01 g of PXZ-TAZ. The yield was over 79%. The compound was further  
16 purified by sublimation under reduced pressure for OLED fabrication.

17  
18 [NMR]

19 <sup>1</sup>H NMR (DMSO, 300 MHz)  $\delta$  = 5.79(d, 2H), 6.67(t, 2H), 6.70(t, 2H), 6.74(d, 2H),  
20 7.39(d, 2H), 7.41(m, 6H), 7.46(d, 2H), 7.52(d, 2H), 7.67(d, 2H); <sup>13</sup>C NMR (CDCl<sub>3</sub>,  
21 300MHz)  $\delta$  = 113.2, 115.6, 121.6, 123.2, 126.7, 127.8, 128.5, 128.8, 129.8, 130.2, 131.0,  
22 131.3, 133.9, 134.6, 140.4, 143.9.

23 <sup>1</sup>H NMR spectrum is shown below.

24 [MS]

25 MALDI-MS *m/z* Calcd for C<sub>32</sub>H<sub>22</sub>N<sub>4</sub>O: 478; found: 478.

26 [Element analysis]

27 Calcd for C<sub>32</sub>H<sub>22</sub>N<sub>4</sub>O: C, 80.32; H, 4.63; N, 11.71; found: C, 80.21; H, 4.58; N, 11.70.

28

1 **4. Preparation of 10,10'-((4-phenyl-4H-1,2,4-triazole-3,5-diyl)bis(4,1-phenylene))-**  
2 **bis(10H-phenoxazine) 2PXZ-TAZ**

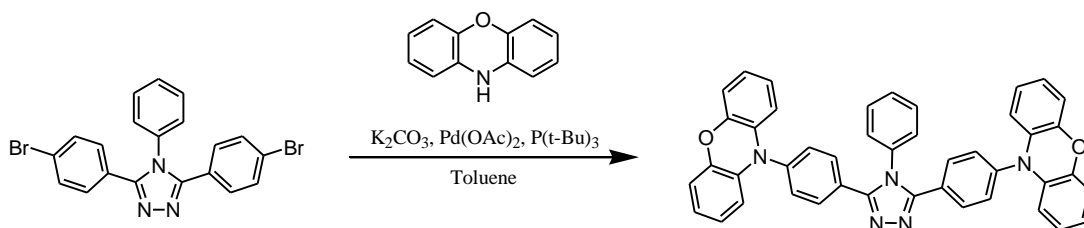

6 To a solution of 3,5-bis(4-bromophenyl)-4-phenyl-4H-1,2,4-triazole (1.50 g, 3.30 mmol,  
7 synthesized by a reported method<sup>S1</sup>), phenoxazine (1.33 g, 7.26 mmol) and potassium  
8 carbonate (3.01 g, 21.8 mmol) in toluene (40 mL) was added, with stirring, a solution of  
9 palladium(II) acetate (49.4 mg, 0.22 mmol) and tri-*tert*-butylphosphine (161.9 mg, 0.80  
10 mmol) in toluene (40 mL). The mixture was stirred and heated under reflux for one day.  
11 The cooled mixture was partitioned between chloroform and water. The organic layer  
12 was separated, and the aqueous layer was extracted with chloroform. The combined  
13 organic layers were washed with brine, dried over MgSO<sub>4</sub>, and concentrated *in vacuo*.  
14 Purification of the residue by column chromatography (eluent: chloroform/hexane=1:4)  
15 afforded 1.52 g of 2PXZ-TAZ. The yield was over 70%. The compound was further  
16 purified by sublimation under reduced pressure for OLED fabrication.

17  
18 [NMR]

19 <sup>1</sup>H NMR (CDCl<sub>3</sub>, 300 MHz)  $\delta$  = 5.88(d, 4H), 6.57(t, 4H), 6.64(m, 8H), 7.30(m, 6H),  
20 7.55(m, 3H), 7.68(d, 4H); <sup>13</sup>C NMR (CDCl<sub>3</sub>, 300MHz)  $\delta$  = 113.2, 115.6, 121.7, 123.2,  
21 126.9, 127.8, 130.4, 131.1, 131.2, 133.8, 135.1, 140.5, 143.9, 154.3.

22 <sup>1</sup>H NMR spectrum is shown below.

23 [MS]

24 MALDI-MS *m/z* Calcd for C<sub>44</sub>H<sub>29</sub>N<sub>5</sub>O<sub>2</sub>: 659; found: 659

25 [Element analysis]

26 Calcd for C<sub>44</sub>H<sub>29</sub>N<sub>5</sub>O<sub>2</sub>: C, 80.10; H, 4.43; N, 10.62; found: C, 80.11; H, 4.37; N, 10.61.

27

1 **5. Ultraviolet-visible and photoluminescence spectra**

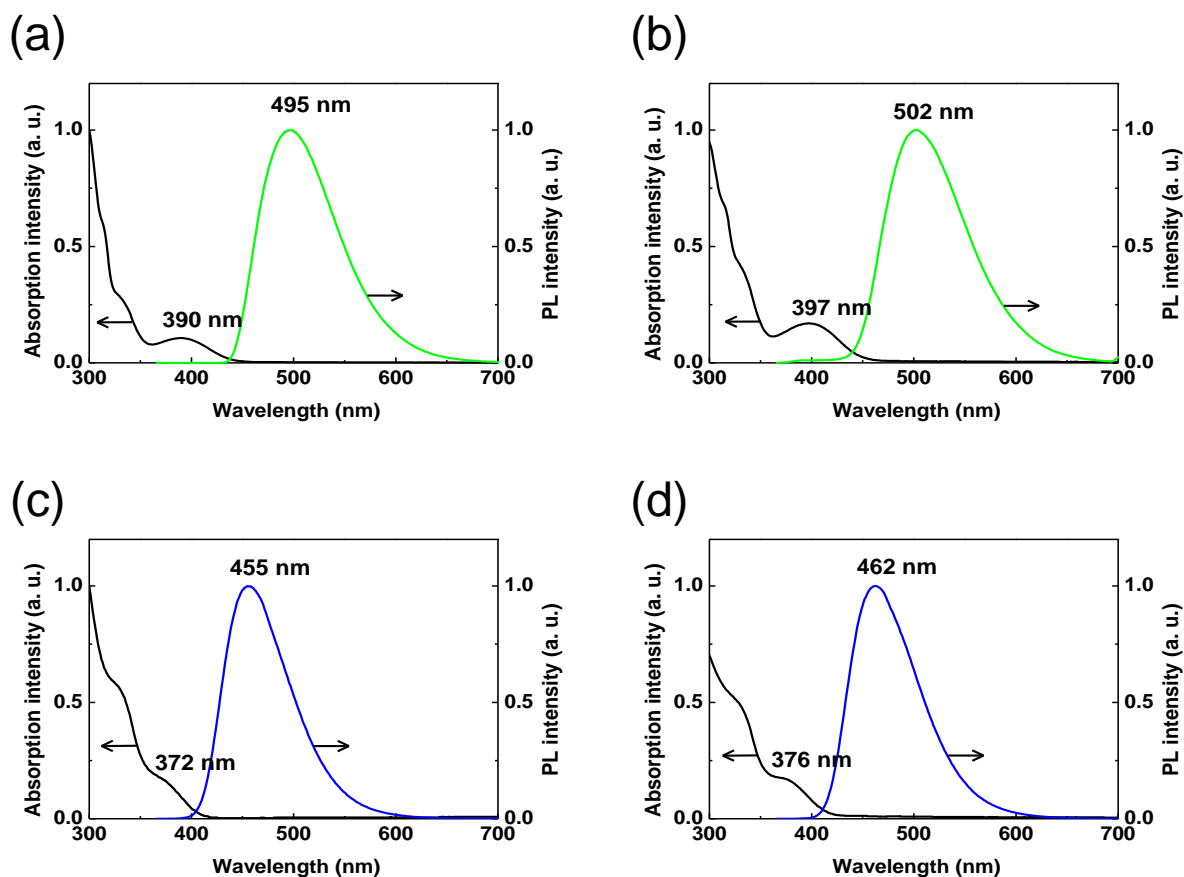

**Supplementary Fig. S1:** Ultraviolet-visible (UV-Vis) and photoluminescence (PL) spectra of (a) PXZ-OXD, (b) 2PXZ-OXD, (c) PXZ-TAZ, and (d) 2PXZ-TAZ. UV-Vis spectra were measured using a UV-Vis spectrophotometer (UV-2550, Shimadzu, Japan). PL spectra were measured using spectrofluorometers (Fluoromax-4, Horiba Jobin Yvon, USA; FP-6500-A-ST, Jasco, Japan). Excitation wavelength was 330 nm.

1 **6. Calculated and experimental absorption and emission wavelengths**

2

3 **Supplementary Table S1:** Absorption ( $\lambda_{\text{ab}}$ ) and emission wavelengths ( $\lambda_{\text{em}}$ ) for  
4 PXZ-OXD, 2PXZ-OXD, PXZ-TAZ, and 2PXZ-TAZ were computed using  
5 time-dependent density functional theory (TD-DFT) at the CAM-B3LYP/cc-pVDZ  
6 level of theory. Solvent effects were taken into account by means of the polarizable  
7 continuum model.

8

| Compound | $\lambda_{\text{ab}}$ (nm) |      | $\lambda_{\text{em}}$ (nm) |      |
|----------|----------------------------|------|----------------------------|------|
|          | Calc.                      | Exp. | Calc.                      | Exp. |
| PXZ-OXD  | 416                        | 390  | 513                        | 495  |
| 2PXZ-OXD | 439                        | 397  | 525                        | 502  |
| PXZ-TAZ  | 366                        | 372  | 428                        | 455  |
| 2PXZ-TAZ | 370                        | 376  | 438                        | 462  |

9

10

1 **7. ORTEP diagram of the crystalline structure of 2PXZ-OXD**

2

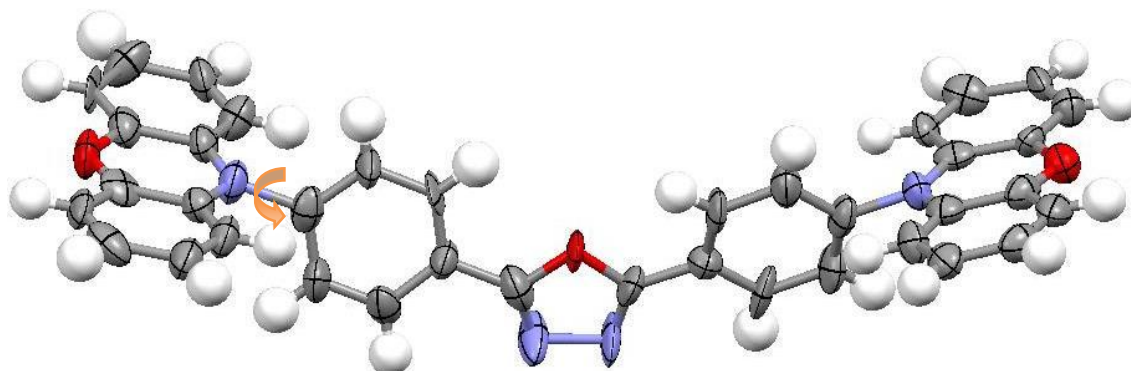

3

4 **Supplementary Fig. S2:** ORTEP diagram of the molecular structure of 2PXZ-OXD  
5 determined by single crystal X-ray diffraction. The torsion angle is 76.7°.

6



1 **8. Calculated  $S_1$  and  $T_1$  excitation energies and  $\Delta E_{ST}$**

2

3 **Supplementary Table S2:** Calculated  $S_1$  and  $T_1$  excitation energies and the difference  
4 between them ( $\Delta E_{ST}$ ) for PXZ-OXD, 2PXZ-OXD, PXZ-TAZ, and 2PXZ-TAZ.

5 Calculation of  $\Delta E_{ST}$  was carried out with TD-DFT at the CAM-B3LYP/cc-pVDZ level  
6 of theory. Oscillator strengths ( $f$ ) of the  $S_1$  states shown in parentheses.

7

| Compound | $S_1$ energy (eV) | $T_1$ energy (eV) | $\Delta E_{ST}$ (eV) |
|----------|-------------------|-------------------|----------------------|
| PXZ-OXD  | 3.49 (0.0001)     | 2.84              | 0.65                 |
| 2PXZ-OXD | 3.40 (0.0000)     | 2.83              | 0.57                 |
| PXZ-TAZ  | 3.80 (0.0000)     | 2.83              | 0.97                 |
| 2PXZ-TAZ | 3.69 (0.0000)     | 2.83              | 0.86                 |

8

9

1 **9. Highest occupied and lowest unoccupied natural transition orbitals for the  $S_1$**   
2 **states of PXZ-OXD, PXZ-TAZ, and PXZ-2TAZ**

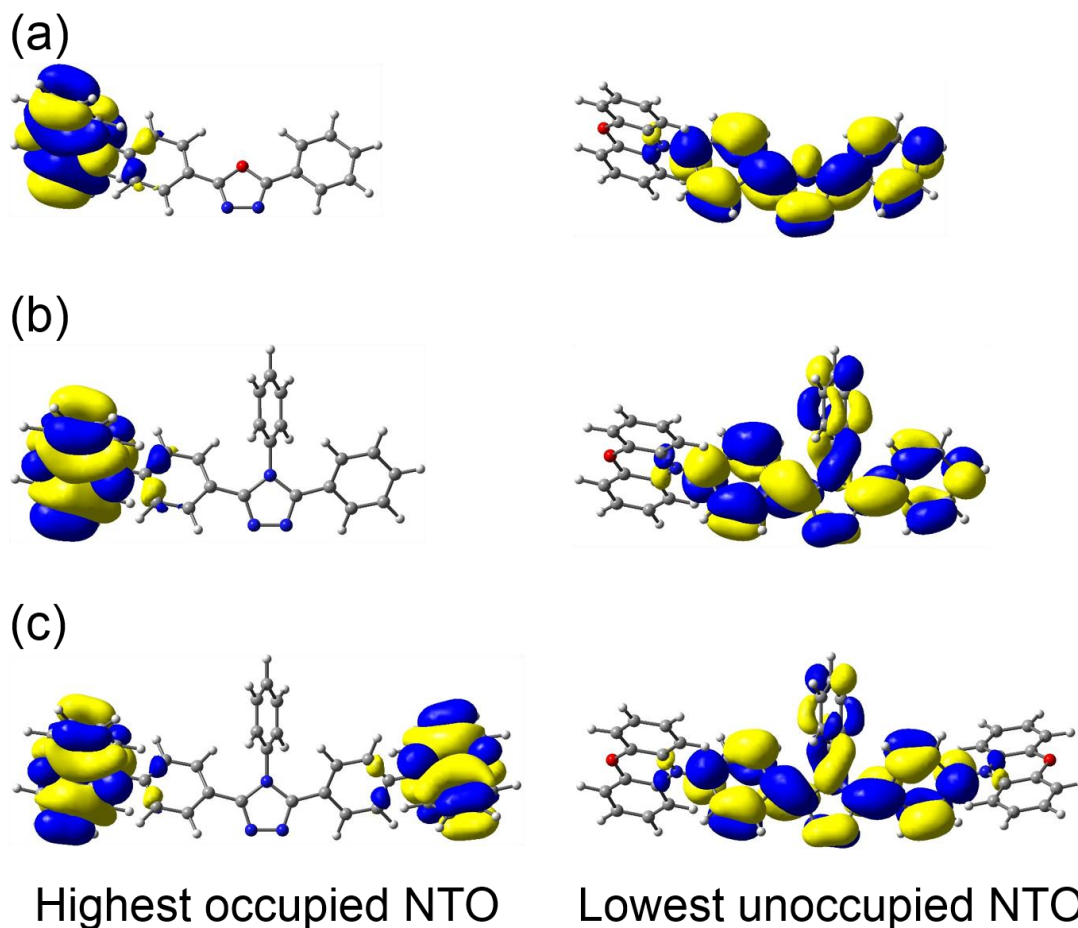

3  
4 **Supplementary Fig. S3:** Highest occupied and lowest unoccupied natural transition  
5 orbitals (NTOs) for the  $S_1$  states of (a) PXZ-OXD, (b) PXZ-TAZ, and (c) PXZ-2TAZ  
6 calculated at the CAM-B3LYP/cc-PVDZ level of theory.

7

1 **10. Temperature dependence of photoluminescence spectrum of 6 wt%**  
2 **2PXZ-OXD:DPEPO film**

3

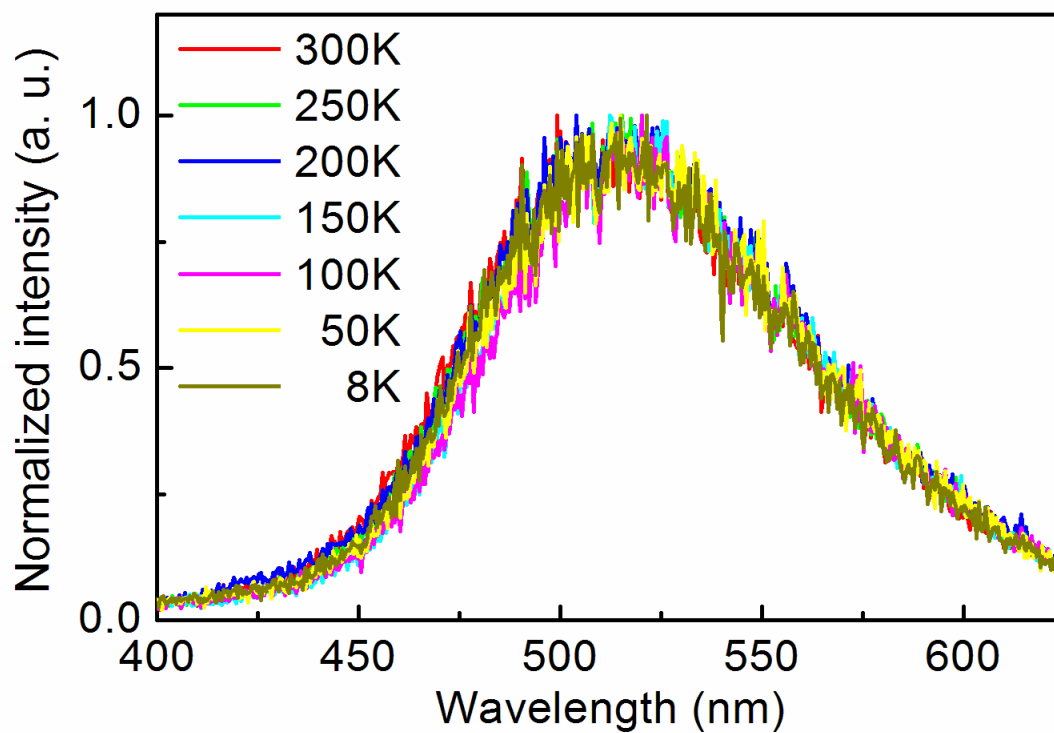

4

5 **Supplementary Fig. S4:** Temperature dependence of photoluminescence spectrum of a  
6 6 wt% 2PXZ-OXD:DPEPO film.

7

8

11. Photoluminescence characteristics of 6 wt% 2PXZ-TAZ:DPEPO film

(a)

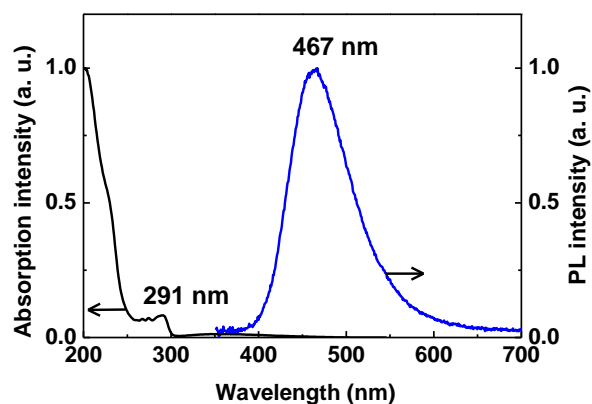

(b)

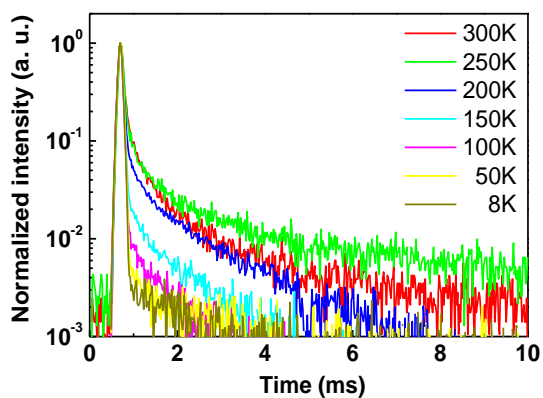

(c)

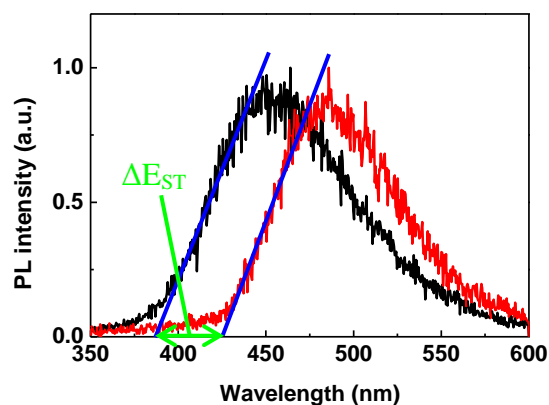

Supplementary Fig. S5: (a) Absorption and PL spectra of a 6 wt% 2PXZ-TAZ:DPEPO film. (b) Transient PL decay curves for the doped film measured at temperatures of 8 to 300 K. (c) Fluorescence and phosphorescence spectra of the doped film measured at 8 K. Black and red lines show fluorescence and phosphorescence spectra, respectively.

1   **References**

2

3   S1. W. Kwon, B. Ahn, D. M. Kim, Y.-G. Ko, S. G. Hahm, Y. Kim, H. Kim, and M. Ree,  
4       *J. Phys. Chem. C*, **115**, 19355-19363 (2011).

5   S2. X. J. Feng, P. L. Wu, K. F. Li, M. S. Wong, and K. W. Cheah, *Chem. Eur. J.* **17**,  
6       2518-2526 (2011).

7   S3. S. Kwon, K.-R. Wee, A.-L. Kim, and S. O. Kang, *J. Phys. Chem. Lett.*, **1**, 295-299  
8       (2010).

9   S4. W. Y. Wong and Y. H. Guo, *J. Mol. Struct.* **890**, 150-156 (2008).

10

- 1 Appendix
- 2 1. <sup>1</sup>H NMR spectrum of PXZ-OXD

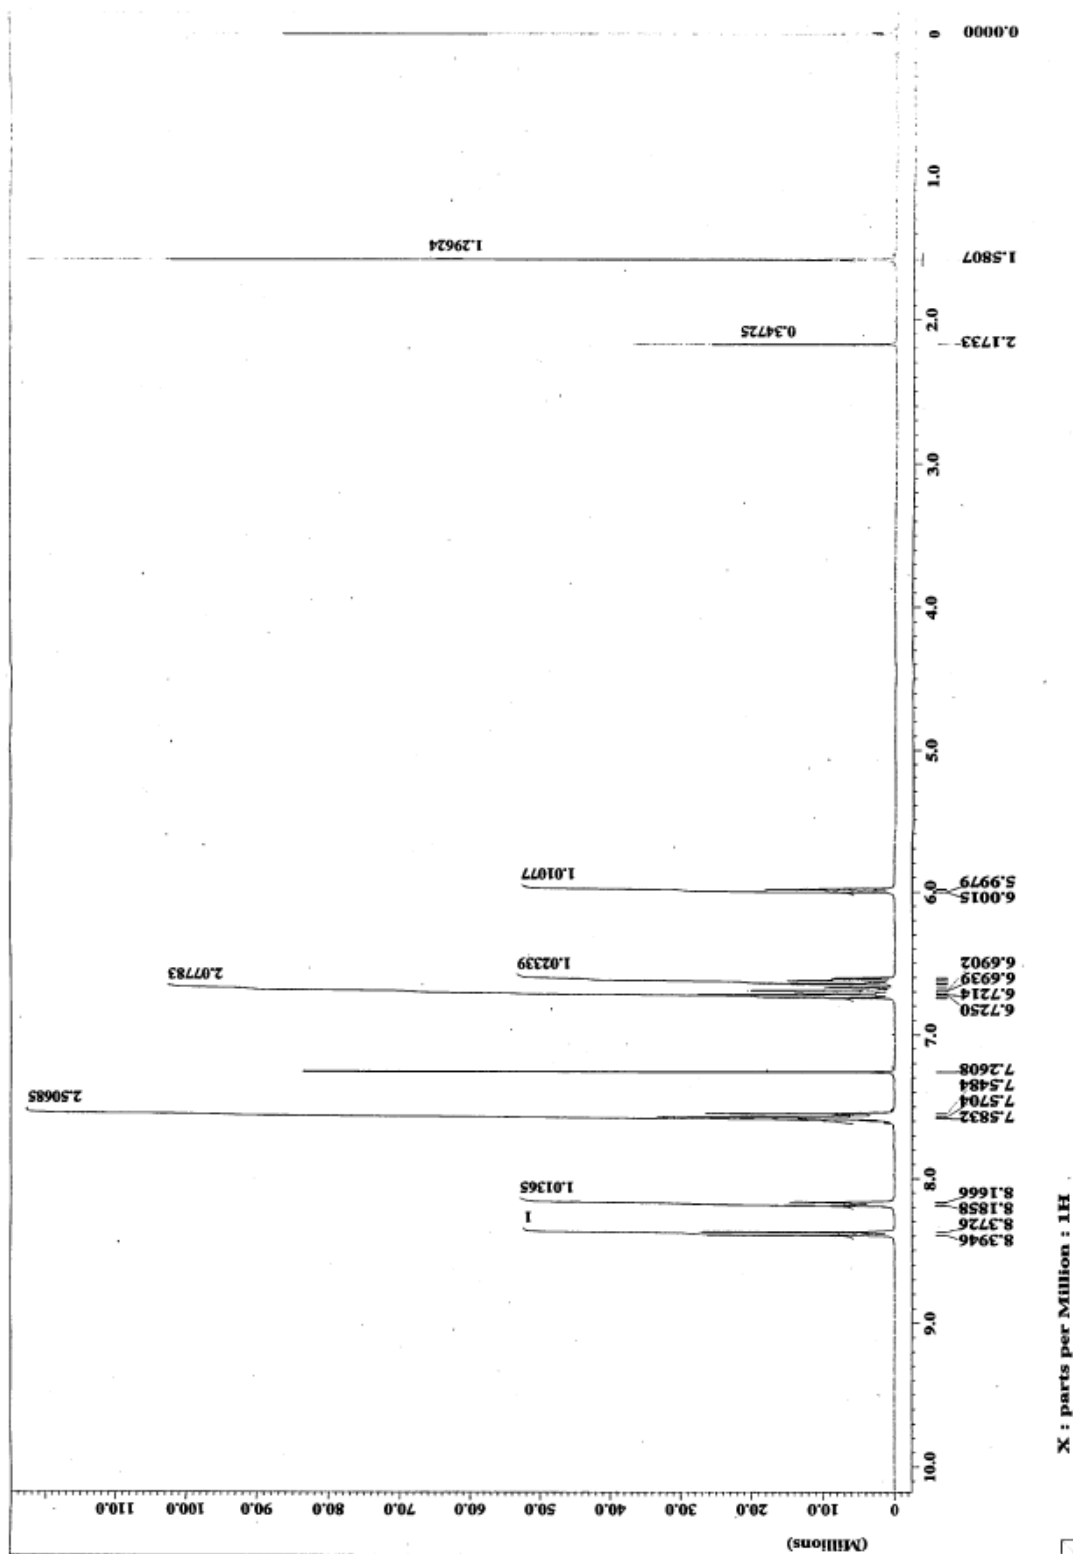

3  
4

1 2.  $^1\text{H}$  NMR spectrum of 2PXZ-OXD

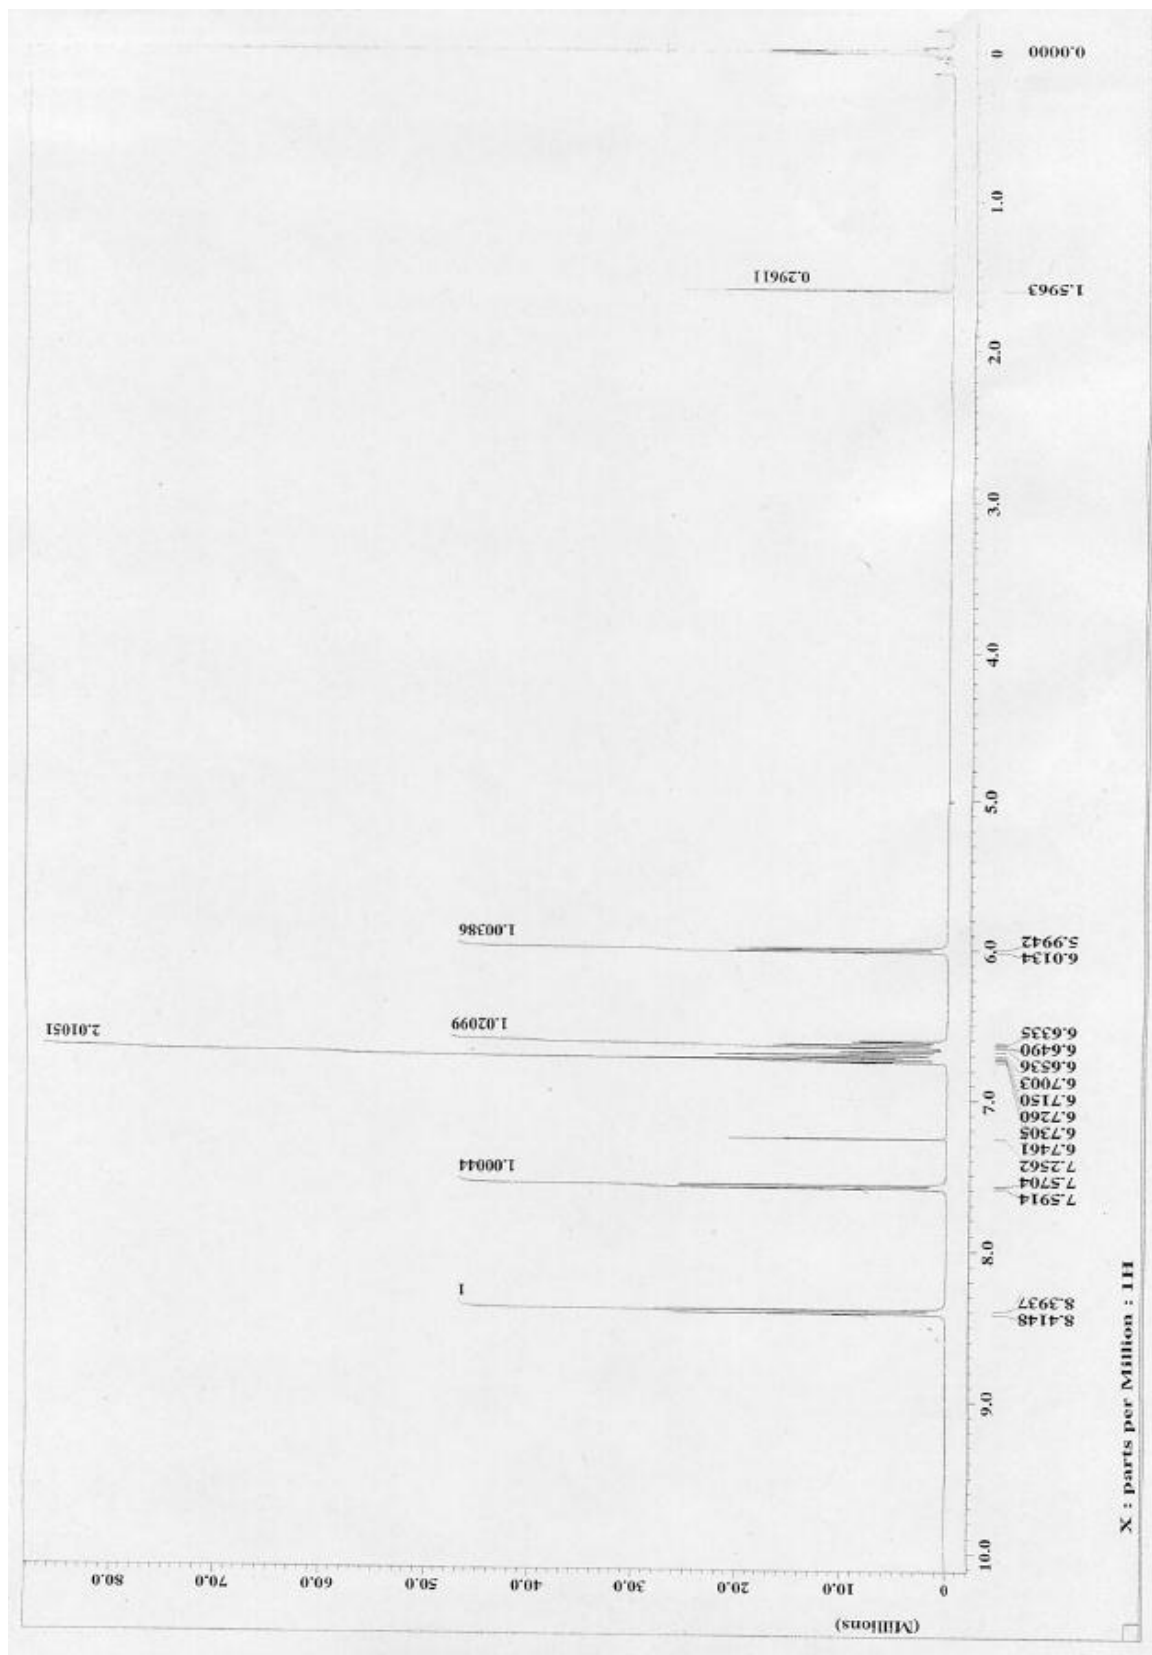

2

3

1 3.  $^1\text{H}$  NMR spectrum of PXZ-TAZ

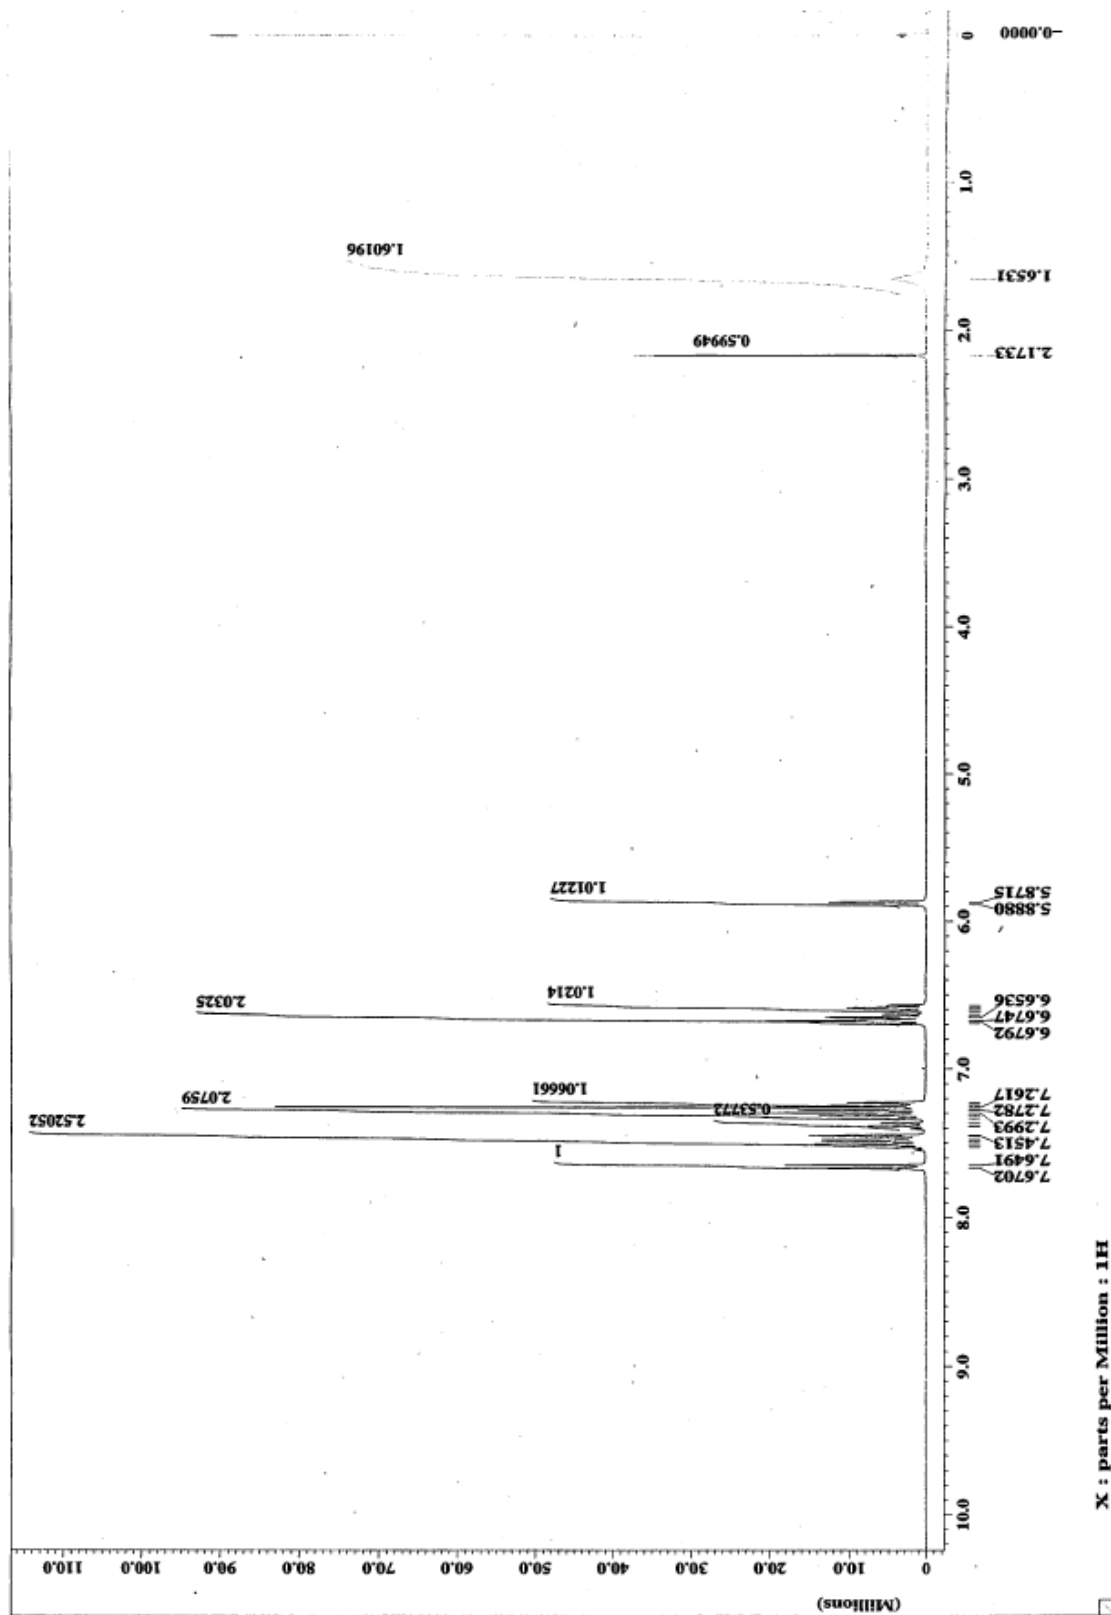

2  
3



1 4.  $^1\text{H}$  NMR spectrum of 2PXZ-TAZ

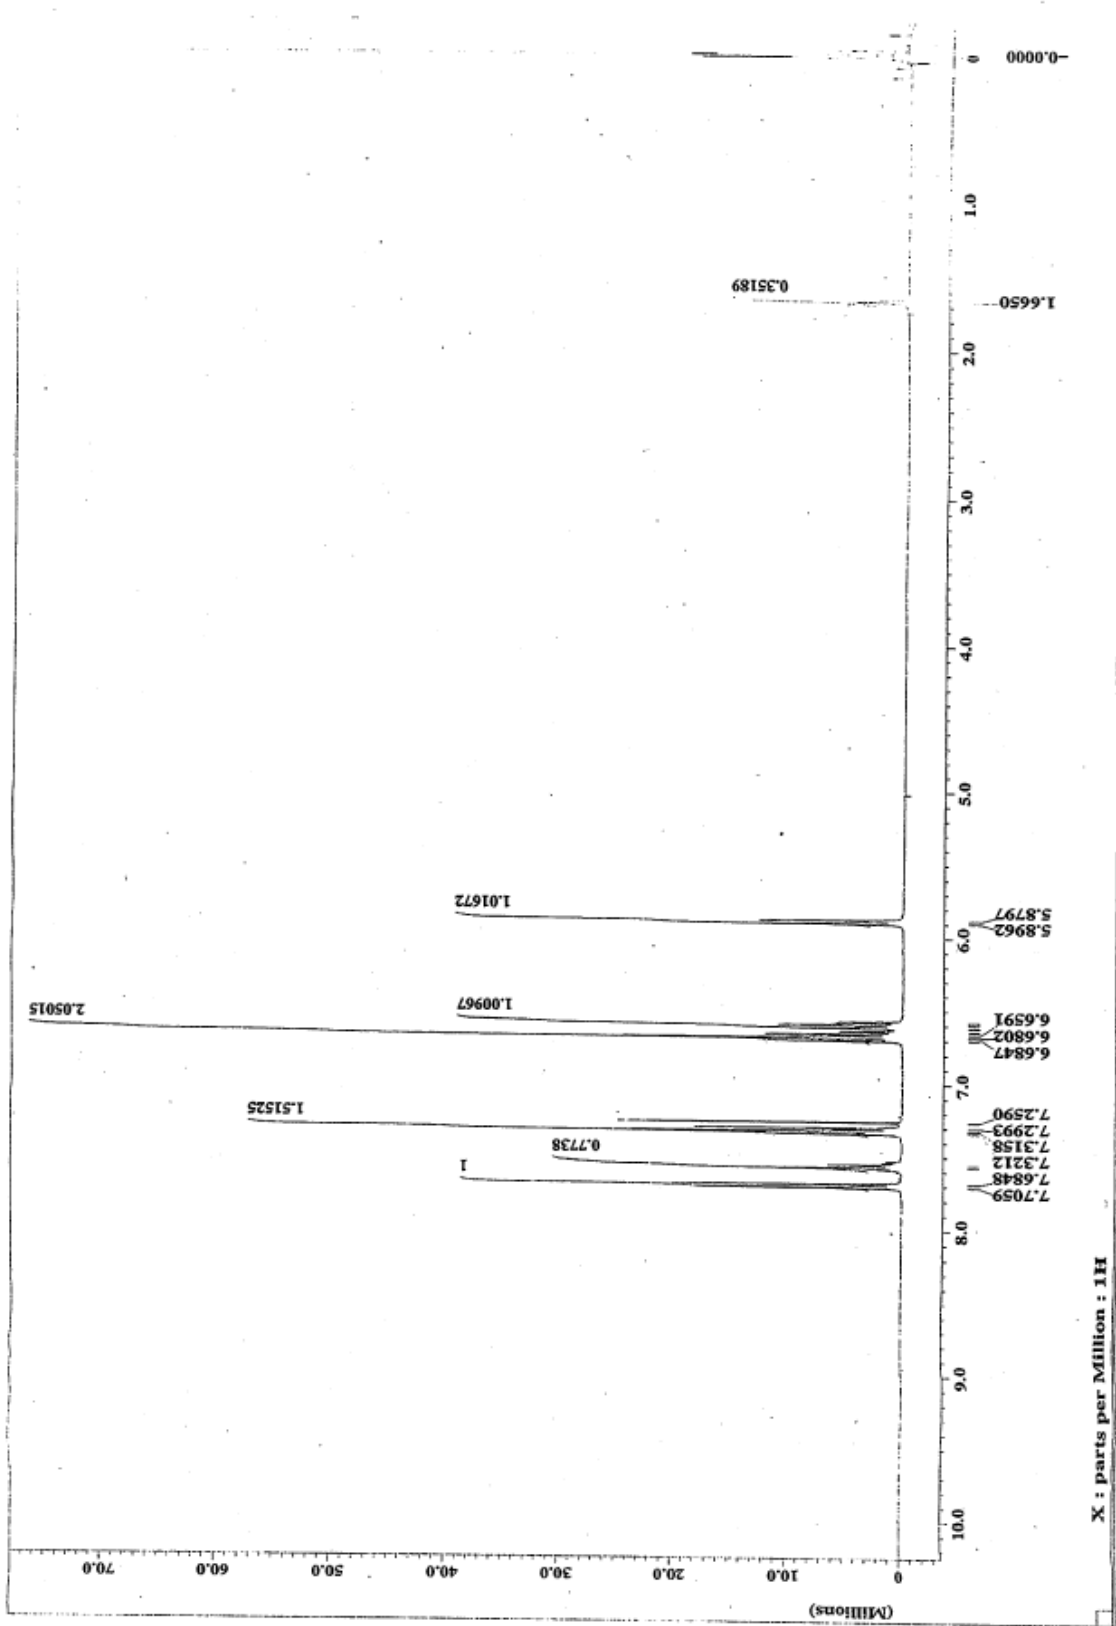

2
